# Supplementary material
Source: publisher site journal article supplement (https://www.dovepress.com/article/460551)
Supplement: Supplementary file 1 [file get_supplementary_file.php]

## Supplementary Materials

**Supplementary Figure S1.** Univariate and multivariate Cox analysis of clinicopathological features in training set and validation sets. (A, B) Univariate and multivariate Cox analysis of clinicopathological features of patients in GSE21653, respectively. (C, D) Univariate and multivariate Cox analysis of clinicopathological features of patients in GSE20685. (E, F) Univariate and multivariate Cox analysis of clinicopathological features of patients in GSE25055.

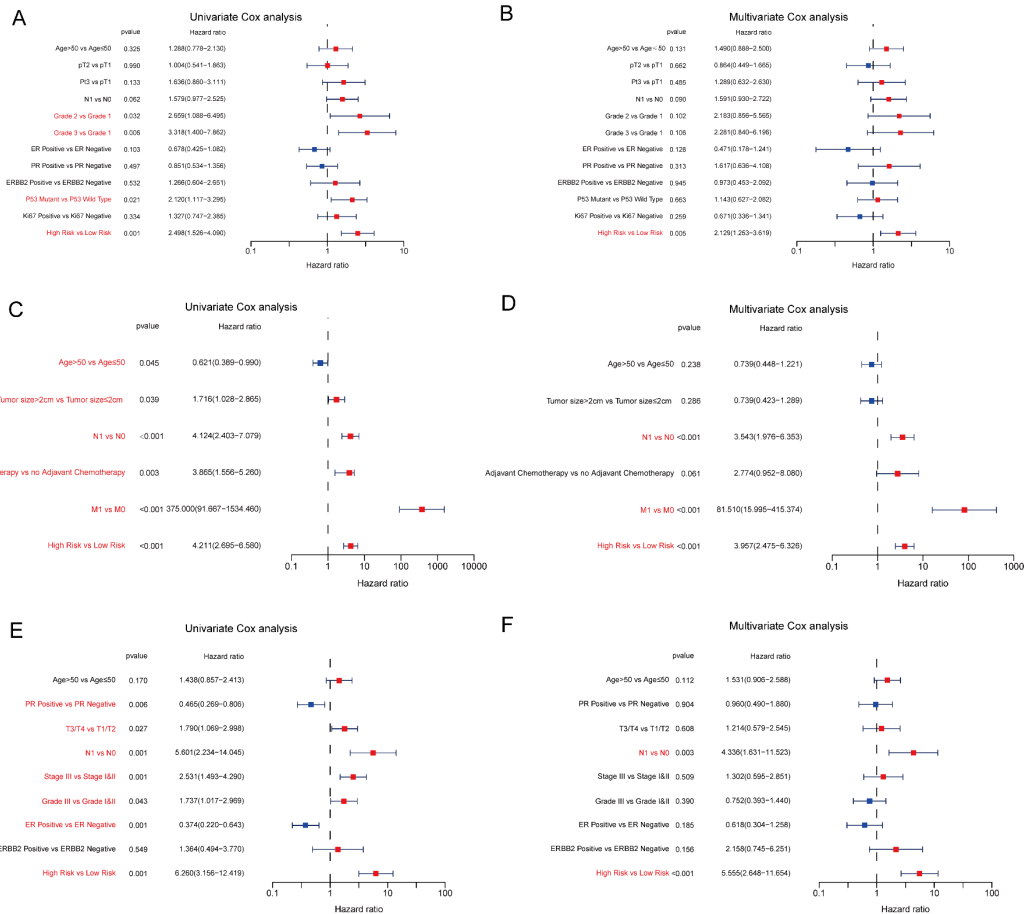

**Supplementary Figure S2.** Validation of necroptosis-related signature in TCGA - BRCA dataset. (A, B) Kaplan-Meier Survival analysis of overall survival for patients in high/low risk and ROC curve of 1-, 3-, 5-year survival in TCGA-BRCA dataset. (C,D) Kaplan-Meier Survival analysis of relapse-free survival for patients in high/low risk and ROC curve of 1-, 3-, 5-year survival in TCGA-BRCA dataset.

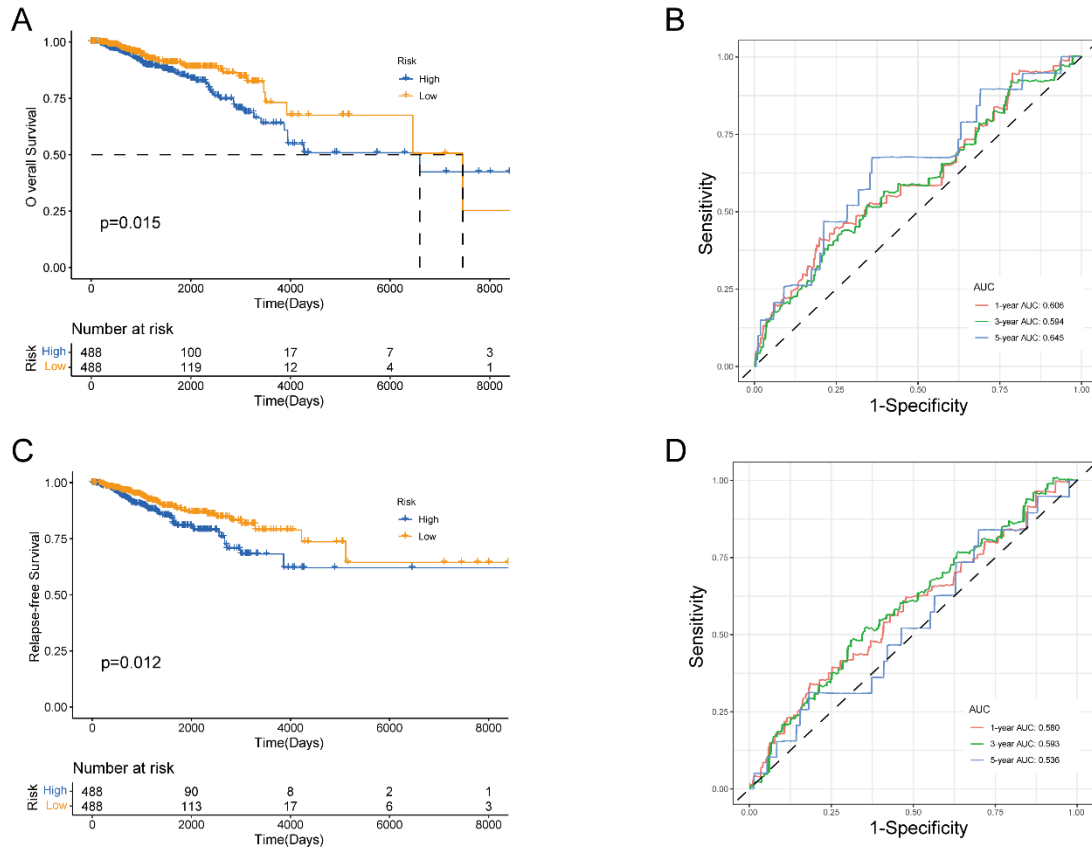

**Supplementary Figure S3. ROC curve of other cell death-related prediction models.** (A) ROC curve of 1-, 3-, 5-year survival of ferroptosis-related gene model (PMID: 35280394) in GSE21653. (B) ROC curve of 1-, 3-, 5-year survival of ferroptosis-related gene model (PMID: 34499616) in GSE21653. (C) ROC curve of 1-, 3-, 5-year survival of ferroptosis-related gene model (PMID: 34222241) in GSE21653. (D) ROC curve of 1-, 3-, 5-year survival of pyroptosis-related gene model (PMID: 35464869) in GSE21653. (E) ROC curve of 1-, 3-, 5-year survival of pyroptosis-related gene model (PMID: 35957895) in GSE21653. (F) ROC curve of 1-, 3-, 5-year survival of pyroptosis-related gene model (PMID: 35656090) in GSE21653.

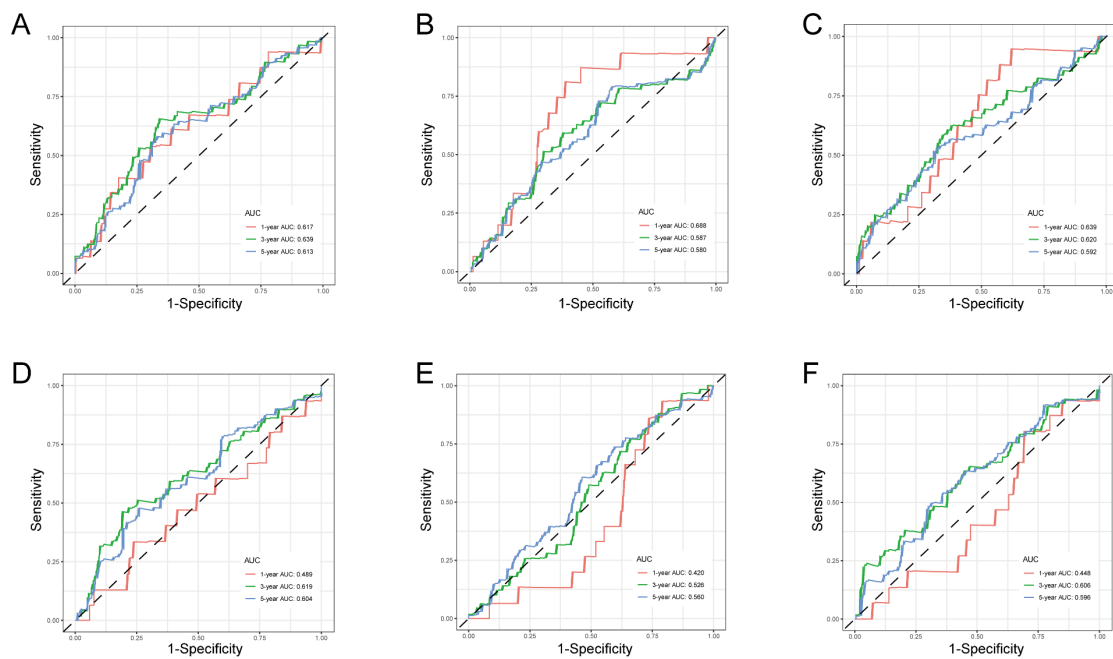

**Supplementary Figure S4.** Correlation between risk score and RCB assessment after neoadjuvant chemotherapy. (\*\*\*,  $p < 0.001$ )

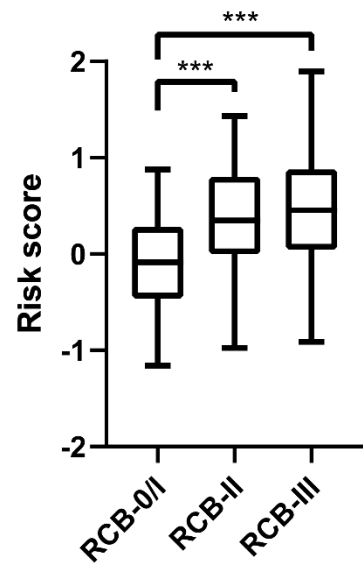

**Supplementary Figure S5.** Kaplan-Meier analysis for patients in BRCA cohort according to the necroptosis-related signature stratified by clinicopathological risk factors. (A, B) Tumor size. (C, D) Tumor grade. (E, F) ER status. (G, H) TRP53 mutation status.

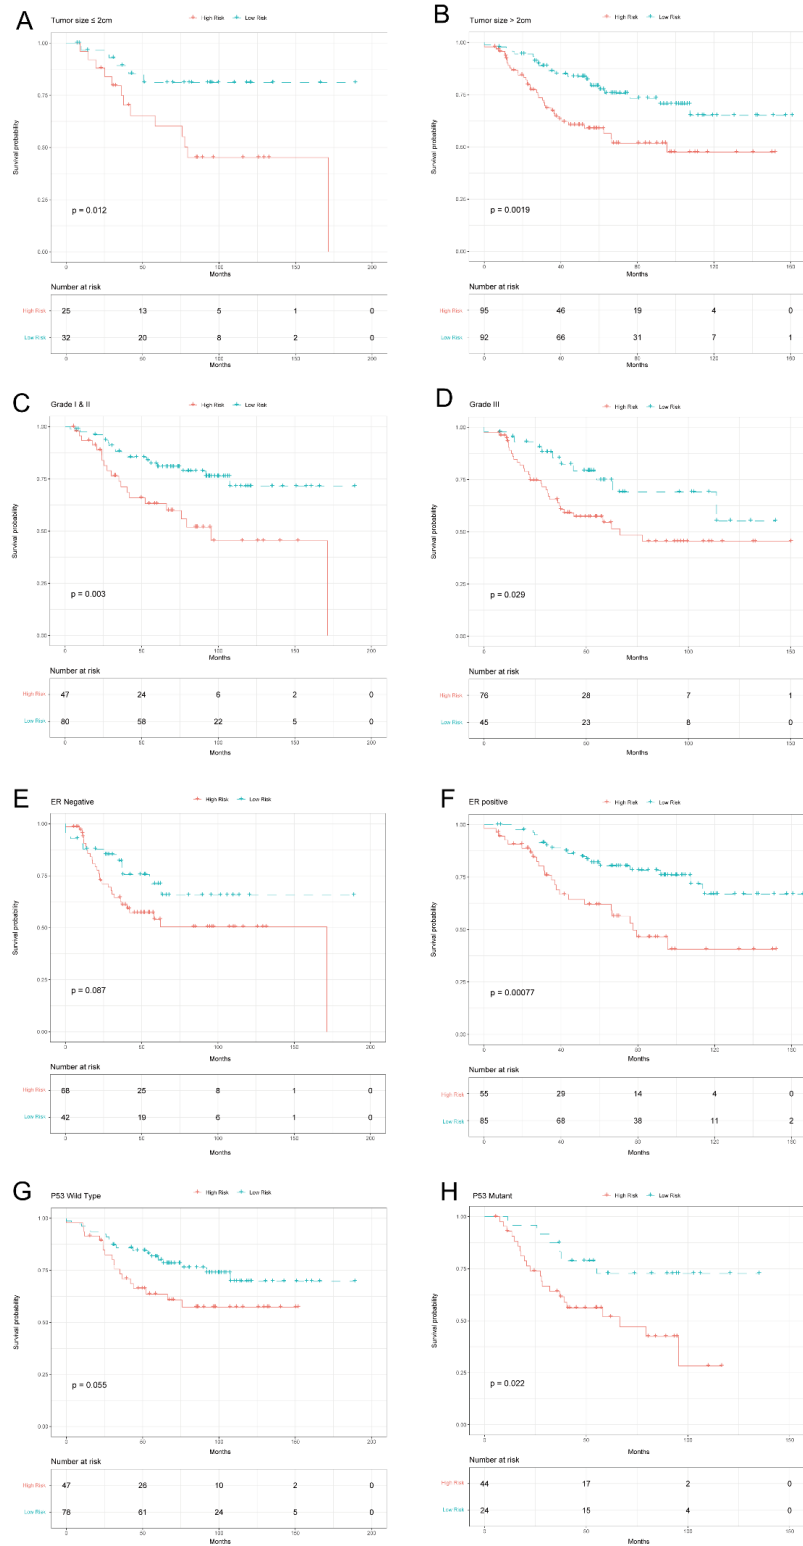

**Supplementary Figure S6.** Immune profiles of two prognostic subgroups after prior therapies. (A) Immune cell infiltration analysis between two subgroups. (B) ESTIMATE analysis for the comparisons between cluster A and B were presented in histogram. (ns, not significant; \*,  $p < 0.05$ ; \*\*,  $p < 0.01$ ; \*\*\*,  $p < 0.001$ )

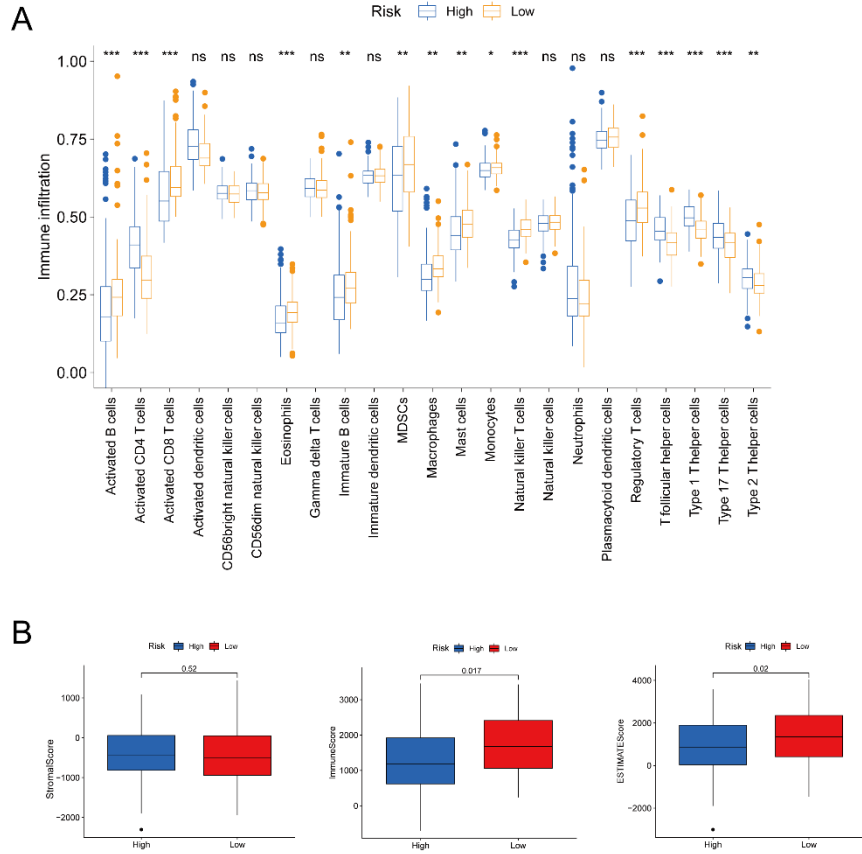

**Supplementary Figure S7. (A-F) Relative mRNA expression of ALDH2, CASP1, EZH2, NLRP3, RIPK3 and TLR3, respectively, in BRCA patients stratified by different clinicopathological risk factors as tumor size, lymph node status, tumor grade, p53 status and molecular subtypes. (ns, not significant; \*,  $p < 0.05$ ; \*\*,  $p < 0.01$ ; \*\*\*,  $p < 0.001$ )**

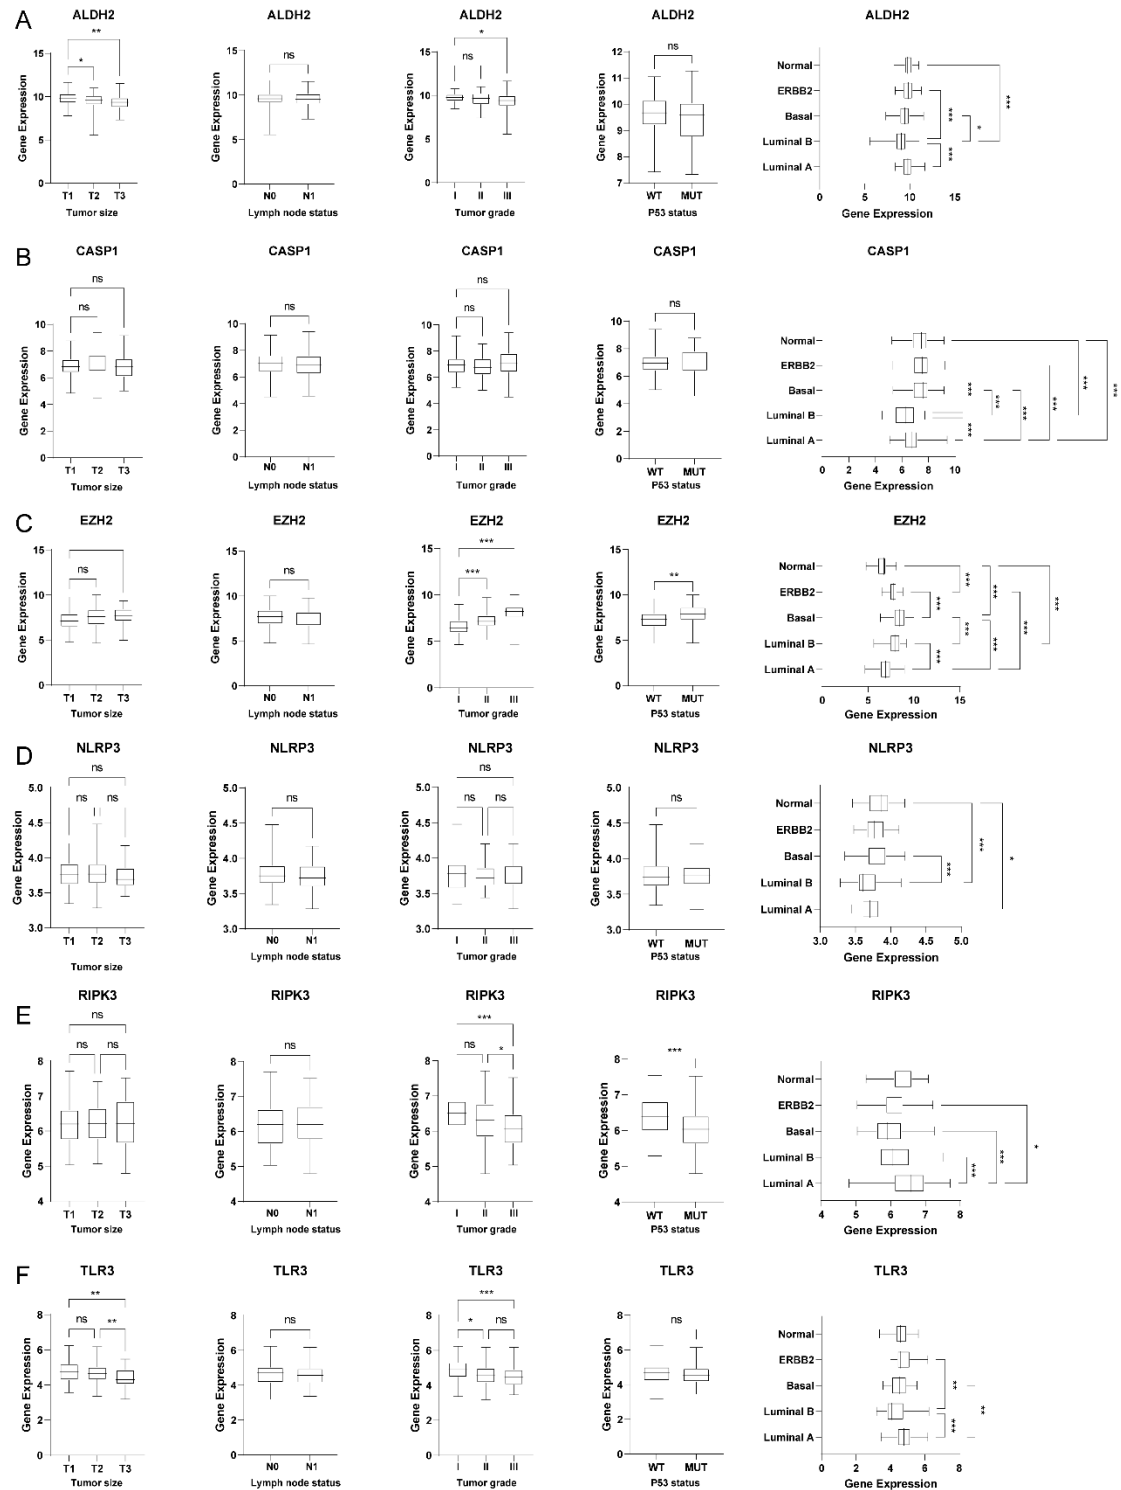

**Supplementary Table S1.** Clinicopathologic characteristics of breast cancer patients in GSE21653 dataset.

| <b>Variables</b>                 | <b>GSE21653</b> |
|----------------------------------|-----------------|
| <b>Age at diagnosis (years)</b>  |                 |
| ≤ 50                             | 87              |
| > 50                             | 165             |
| <b>Tumor size</b>                |                 |
| T1                               | 57              |
| T2                               | 121             |
| T3                               | 66              |
| Unknown                          | 8               |
| <b>Lymph node status</b>         |                 |
| Negative                         | 116             |
| Positive                         | 133             |
| <b>Grade</b>                     |                 |
| I                                | 43              |
| II                               | 84              |
| III                              | 121             |
| <b>ER status</b>                 |                 |
| Negative                         | 110             |
| Positive                         | 140             |
| <b>PR status</b>                 |                 |
| Negative                         | 124             |
| Positive                         | 126             |
| <b>ERBB2 status</b>              |                 |
| Negative                         | 207             |
| Positive                         | 26              |
| Unknown                          | 19              |
| <b>P53 status</b>                |                 |
| Wild Type                        | 125             |
| Mutant                           | 68              |
| Unknown                          | 59              |
| <b>Ki67 status</b>               |                 |
| Negative                         | 58              |
| Positive                         | 142             |
| Unknown                          | 52              |
| <b>Molecular subtype</b>         |                 |
| Basal                            | 75              |
| ERBB2                            | 22              |
| Luminal A                        | 85              |
| Luminal B                        | 44              |
| Normal                           | 26              |
| <b>Vital status</b>              |                 |
| Alive                            | 169             |
| Dead                             | 83              |
| <b>Median follow-up (Months)</b> | 52.92           |



**Supplementary Table S2.** Expression of necroptosis-related genes between two clusters

| Table S2. Expression of necroptosis-related genes between two clusters |          |         |           |            |            |
|------------------------------------------------------------------------|----------|---------|-----------|------------|------------|
|                                                                        | logFC    | AveExpr | t         | P.Value    | adj.P.Val  |
| AIM2                                                                   | -0.18214 | 0.17264 | -9.80871  | 8.19E-22   | 3.49E-21   |
| ALDH2                                                                  | -0.22270 | 0.15471 | -15.99494 | 7.88E-52   | 6.31E-51   |
| BAK1                                                                   | -0.71461 | 0.85340 | -19.57524 | 3.06E-73   | 3.27E-72   |
| BAX                                                                    | -0.02288 | 0.02665 | -6.17285  | 9.48E-10   | 2.43E-09   |
| CASP1                                                                  | -1.30528 | 1.26639 | -20.60360 | 8.79E-80   | 1.41E-78   |
| CASP3                                                                  | -0.14188 | 0.10649 | -4.06793  | 5.09E-05   | 9.58E-05   |
| CASP4                                                                  | -0.48085 | 4.90707 | -9.36454  | 4.32E-20   | 1.73E-19   |
| CASP5                                                                  | -0.43703 | 1.13640 | -4.47759  | 8.35E-06   | 1.78E-05   |
| CASP6                                                                  | -0.45136 | 0.98129 | -5.51323  | 4.41E-08   | 1.04E-07   |
| CASP8                                                                  | -0.93030 | 3.18154 | -13.06115 | 2.68E-36   | 1.90E-35   |
| CASP9                                                                  | -1.27296 | 4.33193 | -18.34229 | 1.31E-65   | 1.20E-64   |
| CHMP2A                                                                 | 0.09950  | 5.45071 | 3.33579   | 0.00087958 | 0.00152143 |
| CHMP2B                                                                 | -0.87881 | 3.00189 | -12.33898 | 8.18E-33   | 5.24E-32   |
| CHMP4B                                                                 | -0.04061 | 0.85601 | -1.11806  | 0.26378933 | 0.30147352 |
| CHMP4C                                                                 | -0.05920 | 0.19740 | -2.10654  | 0.03538847 | 0.05147414 |
| CHMP6                                                                  | -0.00404 | 0.41249 | -0.14127  | 0.88768415 | 0.88768415 |
| CHMP7                                                                  | -0.12812 | 0.59151 | -4.88325  | 1.20E-06   | 2.65E-06   |
| CXCL1                                                                  | -1.64459 | 3.07007 | -23.12505 | 2.17E-96   | 4.63E-95   |
| CYCS                                                                   | 0.66268  | 9.97277 | 6.41193   | 2.15E-10   | 5.72E-10   |
| ELANE                                                                  | -0.10811 | 0.18832 | -3.56087  | 0.00038577 | 0.00068581 |
| EZH2                                                                   | 1.24750  | 3.30636 | 7.16043   | 1.49E-12   | 4.32E-12   |
| GPX4                                                                   | -0.95657 | 5.02496 | -11.41589 | 1.42E-28   | 7.56E-28   |
| GSDMB                                                                  | -0.28922 | 1.24580 | -4.26998  | 2.13E-05   | 4.25E-05   |
| GSDMC                                                                  | -0.60895 | 1.90531 | -10.21738 | 1.87E-23   | 9.20E-23   |
| GSDMD                                                                  | -0.04129 | 0.10134 | -6.12049  | 1.30E-09   | 3.21E-09   |
| GZMA                                                                   | -0.03700 | 0.61218 | -0.71244  | 0.47634628 | 0.51671461 |
| GZMB                                                                   | 0.00362  | 0.09670 | 0.21860   | 0.82700673 | 0.84013382 |
| HMGB1                                                                  | 0.06446  | 0.78165 | 1.23133   | 0.21846693 | 0.25421607 |
| IL18                                                                   | -0.03680 | 1.05022 | -1.00232  | 0.31641378 | 0.34914624 |
| IL1A                                                                   | -0.19824 | 2.46816 | -3.76666  | 0.0001744  | 0.0003189  |
| IL1B                                                                   | 0.03101  | 0.16291 | 1.24162   | 0.21464882 | 0.25421607 |
| IL6                                                                    | -0.02238 | 0.13347 | -1.85528  | 0.06382939 | 0.0888061  |
| IRF1                                                                   | -0.04234 | 0.59717 | -1.48187  | 0.13866612 | 0.17066599 |
| IRF2                                                                   | -0.03833 | 0.29184 | -2.60463  | 0.00932409 | 0.01530107 |
| MLKL                                                                   | 0.09265  | 5.28950 | 2.26377   | 0.02378662 | 0.03713033 |
| NDRG2                                                                  | -0.78826 | 3.30280 | -9.87016  | 4.68E-22   | 2.14E-21   |
| NLRC4                                                                  | 0.26250  | 2.80768 | 5.05350   | 5.09E-07   | 1.16E-06   |
| NLRP1                                                                  | -0.38399 | 5.54476 | -7.57674  | 7.61E-14   | 2.32E-13   |
| NLRP2                                                                  | -0.63314 | 1.12635 | -11.78433 | 3.09E-30   | 1.80E-29   |
| NLRP3                                                                  | -2.51005 | 2.85676 | -28.23652 | 9.72E-132  | 3.11E-130  |
| NLRP6                                                                  | -0.07857 | 0.86967 | -1.61826  | 0.10589959 | 0.13831783 |
| NLRP7                                                                  | -0.24647 | 1.15761 | -7.10370  | 2.20E-12   | 6.13E-12   |
| NOD1                                                                   | -0.39680 | 6.59827 | -7.67425  | 3.71E-14   | 1.19E-13   |
| NOD2                                                                   | -0.03360 | 4.78342 | -0.59607  | 0.55125625 | 0.58800667 |
| NR2C2                                                                  | 0.17166  | 4.34557 | 1.63737   | 0.10184562 | 0.13579416 |
| PGAM5                                                                  | -2.51005 | 2.85676 | -28.23652 | 9.72E-132  | 3.11E-130  |
| PLCG1                                                                  | -0.03311 | 4.19930 | -0.37090  | 0.7107815  | 0.73370994 |
| PRKACA                                                                 | 0.09819  | 5.54820 | 2.74037   | 0.00623848 | 0.01050691 |
| PYCARD                                                                 | -0.03716 | 0.53842 | -1.40926  | 0.15904695 | 0.19205669 |
| RIPK1                                                                  | -0.06647 | 2.93436 | -1.82976  | 0.06756233 | 0.09199977 |
| RIPK3                                                                  | -0.68344 | 0.88433 | -19.96181 | 1.11E-75   | 1.42E-74   |
| SCAF11                                                                 | 0.28586  | 1.45978 | 4.11260   | 4.21E-05   | 8.16E-05   |
| TIRAP                                                                  | -0.02742 | 0.21528 | -1.99997  | 0.04575451 | 0.06507309 |
| TLR2                                                                   | -0.00709 | 0.05117 | -1.05083  | 0.29357219 | 0.32962492 |
| TLR3                                                                   | -0.35203 | 6.36992 | -7.85580  | 9.57E-15   | 3.22E-14   |
| TLR4                                                                   | -0.02522 | 0.10477 | -1.57117  | 0.11643596 | 0.14668582 |
| TNF                                                                    | -0.48800 | 6.24250 | -8.21231  | 6.16E-16   | 2.32E-15   |
| TNFRSF1A                                                               | -0.99857 | 3.10620 | -8.19991  | 6.79E-16   | 2.41E-15   |
| TP53                                                                   | -0.01182 | 0.13833 | -0.39800  | 0.69070612 | 0.72467527 |
| TP63                                                                   | -0.01002 | 0.00801 | -2.17249  | 0.03003643 | 0.04470538 |
| TRAF2                                                                  | -0.00973 | 0.00696 | -2.21087  | 0.02725417 | 0.04153017 |
| USP22                                                                  | -0.11095 | 0.08016 | -4.41400  | 1.12E-05   | 2.31E-05   |
| ZBP1                                                                   | -0.02143 | 0.02403 | -2.51481  | 0.01205448 | 0.01928716 |
